# Supplementary material for: Different In Vitro Drug Susceptibility Profile of Plasmodium falciparum Isolates from Two Adjacent Areas of Northeast Myanmar and Molecular Markers for Drug Resistance
Source: MDPI journal article supplement (doi:10.3390/tropicalmed7120442), 2022-12-17
Supplement: s1 [file s1]

**Table S2.** Ring survival rates of parasite isolates stratified by the K13 alleles.

| <b>Mutations</b> | <b>N</b> | <b>Median RSA<br/>value (%)</b> | <b>IQR</b> | <b>P*</b> |
|------------------|----------|---------------------------------|------------|-----------|
| WT <sup>#</sup>  | 15       | 2.08                            | 1.81-3.89  |           |
| K189T            | 2        | 8.94                            | 7.45-10.43 | 0.0147    |
| F446I            | 33       | 4.93                            | 1.52-8.63  | 0.0381    |
| N458Y            | 2        | 4.96                            | 2.40-7.52  | 0.2941    |

<sup>#</sup> Parasite isolates without any point mutations (including 11 parasites with the NN insertion).

<sup>\*</sup> Comparison between the isolates carrying individual K13 mutations with the WT by Mann-Whitney U test.

N, number of parasite isolates; IQR, interquartile range.
