# Supplementary material for: Different In Vitro Drug Susceptibility Profile of Plasmodium falciparum Isolates from Two Adjacent Areas of Northeast Myanmar and Molecular Markers for Drug Resistance
Source: Trop Med Infect Dis. 2022 Dec 17;7(12):442. doi: 10.3390/tropicalmed7120442 (PMC9782301; doi:10.3390/tropicalmed7120442)
Supplement: Supplementary file 1 [file tropicalmed-07-00442-s001.zip › Table S1.xlsx]

## Sheet: Sheet1
Isolates	Location		DHA(nM)		AS(nM)		AM(nM)		QN(nM)		NQ(nM)		PND(nM)		CQ(nM)		PQ(nM)		MFQ(nM)		PY(nM)		LMF(nM)		pfk13											pfmdr1							pfnhe1			pfmrp1
		RSA	Mean	SD	Mean	SD	Mean	SD	Mean	SD	Mean	SD	Mean	SD	Mean	SD	Mean	SD	Mean	SD	Mean	SD	Mean	SD	NN insertion	K189T	E252Q	P441L	F446I	N458Y	R539T	P574L	C580Y	A676D	H719N	N86Y	E130K	Y184F	S1034I	N1042D	F1226Y	D1246Y		DNNND repeats	NHNDNHNNDDD repeats	H191Y	N325S	S437A	H785N
3D7		0.003	0.7308	0.1276	5.432	2.01	1.345	1.59	86.747	1.91	5.363	2.3908	8.51	1.38	17.98	0.5305	15.4	0.3729	5.202	0.2554	66.73	1.281	4.6	2.9	—	K	E	P	F	N	R	P	C	A	H	N	E	Y	S	N	F	D				H	N	S	H
1	Laiza	0.04235	3.079	0.8783	12.63	2.376	1.873	1.087	8.65	0.913	4.211	1.719	5.314	1.401	32.137	3.938	1.891	0.2505	65.73	2.622	199.967	4.91	2.123	0.4465	NN	K	E	P	F	N	R	P	C	A	H	N	E	Y	S	N	F	D	ms-7	3	1	H	N	S	H
2	Laiza	0.047475	2.329	0.4355	7.838	0.9961	3.741	1.187	74.57	2.936	18.23	3.069	11.67	2.584	101.807	4.88	6.75	0.6724	37.743	2.998	2234.67	21.52	7.936	0.2252	—	K	E	P	F	N	R	P	C	A	H	N	E	Y	S	N	F	D	ms-6	2	1	H	N	S	H
3	Laiza	0.0415	2.446	0.642	13.66	2.009	3.745	1.554	52.86	2.844	3.075	1.55	6.954	1.904	903.233	8.686	6.757	1.101	151.267	5.619	1396	57.58	2.387	0.3158	NN	K	E	P	I	N	R	P	C	A	H	N	E	F	S	N	F	D	ms-5	4	1	Y	N	A	N
4	Laiza	0.10135	3.478	2.07	8.624	1.057	2.703	1.535	205.1	5.479	14.93	0.676	15.15	1.678	66.303	0.4552	1.748	0.138	81.44	5.607	2256	9.539	13.603	0.6603	NN	K	E	P	I	N	R	P	C	A	H	N	E	F	S	N	F	D	ms-5	4	1	Y	N	A	N
5	Laiza	0.054	3.495	1.031	8.876	1.144	2.6	1.222	53.18	6.048	4.034	1.394	5.743	2.393	235.2	3.913	7.773	0.2522	44.78	4.845	2652	20.42	3.273	0.3389	NN	K	E	P	I	N	R	P	C	A	H	N	E	Y	S	N	F	D	ms-6	2	1	Y	N	A	N
6	Laiza	0.0395	3.194	0.9628	12.88	1.195	2.22	2.056	213.1	3.557	42.31	2.428	22.1	2.168	216.7	3.969	12.533	1.091	75.297	1.936	2123	19.52	7.943	0.2363	NN	K	E	P	I	N	R	P	C	A	H	N	E	Y	S	N	F	D	ms-6	2	1	Y	N	A	N
7	Laiza	0.011275	2.64	1.497	4.544	1.205	2.02	1.586	43.53	4.015	4.312	1.45	9.969	1.801	500.667	4.922	15.903	0.04041	67.43	3.61	2315.67	3.512	1.643	0.3703	NN	K	E	P	I	N	R	P	C	A	H	N	E	F	S	N	F	D	ms-7	3	1	Y	N	A	N
8	Laiza	0.04925	3.869	1.162	6.822	1.196	2.322	1.473	36.82	4.885	4.884	0.8668	27.87	3.321	193.8	5.656	3.983	0.022	160.7	5.2	3629	29.87	5.041	0.0673	NN	K	E	P	I	N	R	P	C	A	H	N	E	F	S	N	F	D	ms-5	4	1	Y	N	A	N
9	Laiza	0.0118	3.605	1.166	8.723	0.2917	2.724	1.801	31.08	1.802	15.8	2.071	12.08	4.459	73.723	1.161	6.055	0.2997	101.24	11.74	1872	17.09	12.965	0.7625	NN	K	E	P	I	N	R	P	C	A	H	N	E	F	S	N	F	D	ms-5	4	1	Y	N	A	N
10	Laiza	0.008	3.52	1.902	11.92	1.042	1.814	0.8272	80.61	2.548	15.74	3.436	12.52	2.454	361.767	4.62	7.25	0.3665	38.653	0.9711	2677	25.36	6.309	0.3328	NN	K	E	P	I	N	R	P	C	A	H	N	E	F	S	N	F	D	ms-5	4	1	Y	N	A	N
11	Laiza	0.0494	2.531	0.2058	6.041	1.021	3.144	1.448	60.91	3.427	18.92	3.207	11.86	1.262	311.067	4	9.798	0.796	44.867	3.386	1843	55.07	4.603	0.394	NN	K	E	P	I	N	R	P	C	A	H	N	E	F	S	N	F	D	ms-5	4	1	Y	N	A	N
12	Laiza	0.121425	5.147	0.7286	6.002	0.6219	5.038	0.6608	83.1	1.838	22.53	1.767	12.93	1.889	626.9	2.685	8.48	1.228	72.7	3.776	1935	33.87	7.462	0.1151	NN	K	E	P	I	N	R	P	C	A	H	N	E	F	S	N	F	D	ms-5	4	1	Y	N	A	N
13	Laiza	0	1.955	1.007	4.223	0.6647	2.059	0.5593	57.3	6.471	13.51	3.172	9.568	1.824	730.367	2.329	7.842	0.126	54.903	2.248	1733	30.45	5.338	0.1046	NN	K	E	P	I	N	R	P	C	A	H	N	E	F	S	N	F	D	ms-5	4	1	Y	N	A	N
14	Laiza	0.066775	3.568	0.5008	12.41	1.18	6.094	0.6896	60.99	3.065	13.73	2.112	12.71	1.774	217.033	2.371	13.837	2.304	62.053	1.637	2834	11.79	2.006	0.2545	NN	K	E	P	I	N	R	P	C	A	H	N	E	F	S	N	F	D	ms-5	4	1	Y	N	A	N
15	Laiza	0.0094	2.911	0.6222	5.038	0.5517	2.606	1.532	41.26	4.562	3.862	0.9466	6.561	1.682	132.8	5.147	5.113	1	60.893	6.761	2294.33	96.91	3.49	0.3951	NN	K	E	P	I	N	R	P	C	A	H	N	E	F	S	N	F	D	ms-5	4	1	Y	N	A	N
16	Laiza	0.08165	2.366	1.001	8.595	0.4413	3.167	1.235	27.54	0.6652	19.25	2.569	16.5	1.359	217.433	3.745	15.79	1.464	102.033	3.602	4058	8	1.076	0.2764	NN	K	E	P	I	N	R	P	C	A	H	N	E	Y	S	N	F	D	ms-6	2	1	Y	N	A	N
17	Laiza	0.1137	5.49	0.5964	9.337	0.9605	3.495	1.528	103.2	2.444	16.37	3.893	15.38	2.281	71.21	1.536	13.653	0.7087	30.56	0.8577	2287	64.13	11.02	0.5084	NN	K	E	P	I	N	R	P	C	A	H	N	E	Y	S	N	F	D	ms-6	2	1	H	N	S	H
18	Laiza	0.05035	1.046	0.1023	8.752	0.1444	3.36	0.5659	19.04	3.646	15.72	3.557	13.03	1.225	243.333	6.005	12.247	0.7382	59.107	3.905	2417	14.93	1.964	0.2337	NN	K	E	P	F	N	R	P	C	A	H	N	E	F	S	N	F	D	ms-5	4	1	H	N	S	H
19	Laiza	0.0035	1.65	0.08189	9.607	1.378	3.441	0.8848	39.89	1.218	5.451	1.045	12.03	1.106	96.893	5.873	4.455	0.8794	40.647	4.837	2407	26.66	3.478	0.2524	NN	K	E	P	I	N	R	P	C	A	H	N	E	F	S	N	F	D	ms-5	4	1	Y	N	A	N
20	Laiza	0.110125	3.951	0.2016	12.11	0.2997	6.193	0.9104	46.78	1.322	9.051	1.13	7.328	2.012	440.567	6.451	20.287	1.786	105.303	9.532	2056	21.93	2.712	0.09686	NN	K	E	P	I	N	R	P	C	A	H	N	E	Y	S	N	F	D	ms-6	2	1	Y	S	A	H
21	Laiza	0.14715	4.332	0.4079	14.37	3.405	4.194	0.4457	55.64	5.214	4.7	0.7841	16.44	1.564	75.553	3.243	9.702	0.1631	113.467	3.15	2281.33	4.163	7.009	0.4559	NN	K	E	P	I	N	R	P	C	A	H	N	E	F	S	N	F	D	ms-5	4	1	Y	N	A	N
22	Laiza	0.019675	2.029	1.003	13.88	0.1548	2.058	0.5813	30.14	8.084	8.607	0.558	5.776	1.331	678.767	4.966	30.713	1.258	391.867	27.06	1783	9.165	5.942	0.4039	NN	K	E	P	I	N	R	P	C	A	H	N	E	F	S	N	F	D	ms-5	4	1	Y	N	A	N
23	Laiza	0.052325	2.235	0.6861	11.14	1.301	2.745	0.1889	96.09	0.4637	11.1	1.682	7.333	2.086	116.867	4.524	3.945	0.5341	59.55	3.339	1454	13.08	14.932	0.1872	NN	K	E	P	I	N	R	P	C	A	H	N	E	F	S	N	F	D	ms-5	4	1	Y	N	A	N
24	Laiza	0.02075	1.562	0.2492	6.373	0.6989	2.076	0.947	314.7	2.307	6.93	0.9357	14.44	7.876	215.167	4.2	8.137	0.5905	76.853	4.083	2555	19.97	2.088	0.08591	NN	K	E	P	F	N	R	P	C	A	H	Y	E	Y	S	N	F	D	ms-6	2	1	Y	N	A	N
25	Laiza	0.0158	2.481	0.07927	6.421	0.1852	3.2	0.9104	29.36	3.223	14.18	0.7886	8.542	2.961	741.8	3.041	20.563	3.19	144.2	8.771	2482	13	8.639	0.3389	NN	K	E	P	I	N	R	P	C	A	H	N	E	Y	S	N	F	D	ms-6	2	1	Y	N	A	N
26	Laiza	0.096975	3.453	0.8033	6.984	0.1382	3.094	1.703	64.32	3.179	13.93	2.032	13.13	3.104	245.9	3.831	2.863	0.694	103.21	5.536	2438	17.09	4.204	0.3515	NN	K	E	P	I	N	R	P	C	A	H	N	E	F	S	N	F	D	ms-5	4	1	Y	N	A	N
27	Laiza	0.0534667	1.681	0.6062	8.906	0.158	2.872	1.606	25.92	3.568	12.69	1.936	11.3	2.538	253.433	4.706	5.99	0.518	65.563	3.123	3969	12	4.963	0.1529	NN	K	E	P	I	N	R	P	C	A	H	N	E	F	S	N	F	D	ms-5	4	1	Y	N	A	N
28	Laiza	0.07445	2.157	0.4236	6.466	0.3837	1.766	0.6085	88.47	2.03	14.8	2.739	10.71	3.209	236.4	6.811	8.416	0.4992	130.133	7.696	1337	21.79	2.388	0.1001	NN	K	E	P	I	N	R	P	C	A	H	N	E	F	S	N	F	D	ms-5	4	1	Y	N	A	N
29	Laiza	0.0909	2.424	0.9529	5.336	0.3401	2.121	0.8828	61.49	3.872	7.978	1.3	10.13	2.158	648.333	6.815	17.62	1.074	80.773	4.597	2610.67	5.132	2.95	0.06799	NN	K	E	P	I	N	R	P	C	A	H	N	E	F	S	N	F	D	ms-5	4	1	Y	N	A	N
30	Laiza	0.064525	2.196	0.9626	8.968	0.555	3.32	0.4653	132.1	2.608	4.267	0.5827	5.518	0.5343	114.033	4.153	2.646	0.7016	62.35	3.206	1626	6.245	8.653	0.7785	NN	K	E	P	I	N	R	P	C	A	H	N	E	F	S	N	F	D	ms-5	4	1	Y	N	A	N
1	Muse	0.0745	1.5	0.5572	1.513	0.3878	1.762	0.4833	32.22	2.203	7.369	1.663	4.289	2.02	221.167	2.984	7.031	0.9612	60.32	5.552	258.3	5.378	2.514	0.3495	—	T	E	P	F	N	R	P	C	A	H	N	K	Y	S	N	F	D	ms-7	3	1	Y	N	A	N
2	Muse	0.1043	3.59	0.8979	6.233	0.5238	2.989	1.988	192.1	7.724	6.356	0.815	7.391	2.115	110.4	6.302	16.92	0.2868	217.3	3.156	298.2	2.571	4.114	0.1845	—	T	E	P	F	N	R	P	C	A	H	N	K	Y	S	N	F	D	ms-7	3	1	Y	N	A	N
3	Muse	0.019025	2.065	0.5784	8.835	0.3895	2.593	1.917	136.3	7.171	9.341	1.157	6.147	1.716	55.413	2.318	7.031	0.3002	81.5	0.3804	2166.67	17.93	2.26	0.2169	NN	K	E	P	F	N	R	P	C	A	H	N	E	Y	S	N	F	D	ms-7	3	1	Y	N	A	N
4	Muse	0.0345	1.997	0.5959	11.32	2.436	3.582	1.465	12.33	0.5541	4.272	1.871	4.916	1.609	184.5	6.602	8.368	1.126	16.987	0.9914	2075	27.5	1.48	0.1652	—	K	E	P	F	N	R	P	C	A	H	N	E	Y	I	N	F	D	ms-5	4	1	Y	N	A	N
5	Muse	0.03885	3.802	0.912	9.881	1.484	2.378	0.2775	146.9	8.075	13.58	1.66	12.83	2.841	86.477	7.217	13.893	1.506	147.067	3.089	2034	34.66	5.916	0.4612	NN	K	E	P	F	N	R	P	C	A	H	N	E	Y	S	N	F	D	ms-7	3	1	Y	S	A	H
6	Muse	0.03685	1.615	0.6799	3.64	1.128	2.304	2.381	40.3	4.254	10.11	0.9751	13.51	2.143	235.867	2.663	29.107	3.506	86.627	6.977	2410	14.42	2.327	0.1548	NN	K	E	P	F	N	R	P	C	A	H	N	E	Y	S	N	F	D	ms-7	3	1	Y	N	A	H
7	Muse	0.0336	2.42	0.225	7.025	0.1051	2.583	1.409	49	5.99	2.755	0.1536	5.655	1.743	105.7	3.132	11.587	0.1301	69.043	3.446	280	7.312	1.221	0.1315	NN	K	E	P	I	N	R	P	C	A	H	N	E	Y	S	N	Y	D	ms-21	1	1	Y	N	A	N
8	Muse	0.01095	1.997	0.9478	4.544	0.9054	2.365	1.542	85.72	0.7894	9.328	2.027	7.726	1.225	212.767	2.139	8.242	0.6	79.947	2.556	1961	12.29	7.216	0.4106	NN	K	E	P	I	N	R	P	C	A	H	N	E	Y	S	N	Y	D	ms-7	3	1	Y	N	A	N
9	Muse	0.014525	5.045	0.8854	7.083	1.47	2.169	1.266	60.92	3.421	6.779	0.5934	5.429	1.777	232.1	2.364	1.735	0.4563	103.553	6.174	1951	23.3	1.306	0.1765	NN	K	E	P	I	N	R	P	C	A	H	N	E	Y	S	N	Y	D	ms-7	3	1	Y	N	A	N
10	Muse	0.024	4.8	0.1596	10.53	0.9551	3.277	1.782	27.35	2.277	7.68	0.8839	7.925	1.551	545.2	4.06	3.12	0.9088	116.6	3.487	381.467	5.072	7.74	0.2535	NN	K	E	P	I	N	R	P	C	A	H	N	E	Y	S	N	F	D	ms-6	2	1	Y	N	A	H
11	Muse	0.01015	2.277	1.666	6.245	0.4544	1.497	0.5895	274.2	10.06	3.067	0.7516	4.294	1.607	283.933	6.038	5.453	0.4442	269.533	6.145	479	6.447	0.908	0.06587	NN	K	E	P	F	N	R	P	C	A	H	N	E	Y	S	N	Y	D	ms-7	3	1	Y	N	A	N
12	Muse	0.127567	1.495	0.9822	3.379	1.07	2.519	0.7273	72.22	5.315	5.509	1.946	2.944	1.881	243.6	3.568	15.45	0.9052	52.55	3.102	2640	28.93	1.356	0.1206	NN	K	E	P	I	N	R	P	C	A	H	N	E	Y	S	N	Y	D	ms-3	1	2	Y	N	A	N
13	Muse	0.01975	2.054	0.3908	6.772	0.215	2.627	1.549	24.97	1.758	2.178	1.181	5.128	1.436	854.633	4.661	8.557	1.243	151.367	10.17	571.133	4.669	12.71	0.7102	—	K	E	P	F	N	R	P	C	A	H	N	E	Y	S	D	Y	D	ms-7	3	1	Y	N	A	N
14	Muse	0.024	1.957	0.9373	5.097	0.6184	1.784	0.5036	155.1	11.41	3.677	1.473	3.673	1.258	447.033	5.255	9.671	0.3712	167.267	9.4	355.733	2.635	2.201	0.1687	NN	K	E	P	F	Y	R	P	C	A	H	N	E	Y	S	N	Y	D	ms-7	3	1	Y	N	A	H
15	Muse	0.07515	1.957	0.5761	4.189	0.6282	1.929	0.5428	203.1	7.107	4.505	1.311	4.436	1.741	426.633	2.663	7.364	1.49	23.7	3.245	298.2	2.571	0.876	0.02438	NN	K	E	P	F	Y	R	P	C	A	H	N	E	Y	S	N	F	D	ms-7	3	1	Y	N	A	H
16	Muse	0.02865	1.477	0.5735	1.995	1.047	2.6	1.523	20.1	3.497	5.518	2.095	23.88	4.915	641.267	3.585	14.147	2.81	32.01	1.095	1393	17.09	1.311	0.1209	NN	K	E	P	F	N	R	P	C	A	H	N	E	Y	S	N	F	D	ms-7	3	1	H	N	S	H
17	Muse	0.0376	1.749	0.9572	2.955	1.373	2.404	1.357	230.9	16.65	4.692	1.059	9.865	1.396	661.3	7.219	9.749	0.7963	51.477	7.369	383.767	6.239	2.403	0.1132	NN	K	E	P	I	N	R	P	C	A	H	N	E	Y	S	N	F	D	ms-3	1	2	Y	N	A	H
18	Muse	0.019	1.779	1.059	1.693	0.3352	2.662	2.017	56.35	2.556	10.59	2.192	6.917	0.9208	715.6	4.107	18.797	1.868	77.713	3.082	484.633	5.871	3.424	0.1353	NN	K	E	P	F	N	R	P	C	A	H	N	E	Y	S	N	F	D	ms-21	1	1	Y	S	A	H
19	Muse	0.003	3.075	0.872	4.367	0.8765	2.611	1.511	184.6	4.13	11.3	1.476	21.78	3.673	2616	13.45	66.653	7.899	260.5	14.56	2352	29.82	0.826	0.0651	—	K	E	P	F	N	R	P	C	A	H	N	K	Y	S	N	F	D	ms-7	3	1	Y	N	A	H
20	Muse	0	2.49	1.64	4.839	1.045	1.988	0.9849	1113	4.726	13.59	1.576	13.36	3.264	257.567	6.311	3.905	0.3806	33.633	0.8154	2227.33	9.539	2.191	0.1877	NN	K	E	P	F	N	R	P	C	A	H	N	E	Y	S	N	F	D	ms-7	3	1	Y	N	A	H
21	Muse	0.023	2.329	1.113	4.171	0.978	2.469	1.735	18.76	1.18	5.136	1.006	6.374	2.178	217.7	2.951	5.721	0.6527	38.38	2.369	362.133	6.453	3.568	0.2139	NN	K	E	P	I	N	R	P	C	A	H	N	E	Y	S	N	F	D	ms-7	3	1	Y	N	A	N
22	Muse	0.018075	1.796	0.651	4.308	1.276	2.254	1.528	12.41	0.5524	3.895	0.5047	4.955	1.622	162.3	5.11	5.488	1.472	39.22	2.043	282.233	5.463	2.147	0.1453	NN	K	E	P	F	N	R	P	C	A	H	N	E	Y	S	N	F	D	ms-7	3	1	Y	N	A	N
[truncated: 19 more columns]
